# Supplementary material
Source: PubMed Central journal article supplement (PMC4427347)
Supplement: NIHMS685072-supplement-TAND_Checklist.pdf [file NIHMS685072-supplement-TAND_Checklist.pdf]

# THE TAND CHECKLIST

## Lifetime version (TAND-L)

**Tuberous Sclerosis Complex (TSC)** is associated with a range of neuropsychiatric disorders which we refer to as **TAND (TSC-Associated-Neuropsychiatric-Disorders)**. All people with TSC are at risk of having some of these difficulties. Some people with TSC have very few, while others will have many of them.

Each person with TSC will therefore have their own TAND profile, and this profile may change over time. This checklist was developed to help clinical teams, individuals with TSC and their families

a) screen for TAND at every clinic visit and b) prioritize what to do next.

### Instructions for use

The TAND Checklist was designed to be completed by a clinician with relevant knowledge and experience in TSC, *in partnership* with individuals with TSC or their parents/carers.

The Checklist should take about **10 minutes** to complete.

Where individuals answer **YES** to an item, the clinician should explore the difficulty in sufficient detail to help guide decisions about further evaluation or treatment. **All items should be completed.**

### About the interview

Name of TSC Subject: ..... DOB:   /   /   Age:

Name of Interviewer: ..... Date of interview:   /   /

Name of interviewee: ..... Self / Parent / Carer / Other (circle)

### Let's begin

As you will know, the majority of people with TSC have some difficulty in learning, behavior, mental health, specific aspects of their development and so on. We are going to use this checklist to help us check for these kinds of difficulties. I am going to ask you a number of questions.

Some may be directly relevant; some might not be relevant at all. Just answer as best as you can.

At the end I will check to see if there are any additional difficulties we didn't talk about.

For parents/carers of individuals with TSC, please start with question 1.

For individuals with TSC who complete this about themselves, please start with question 3.

## 01

Let's begin by talking about [subject]'s development to get a sense of where they are at. How old was [subject] when he/she:

- a. First smiled? Age:  Not yet:
- b. Sat without support? Age:  Not yet:
- c. Walked without holding on? Age:  Not yet:
- d. Used single words other than "mama" or "dada"? Age:  Not yet:
- e. Used two words/short phrases? Age:  Not yet:
- f. Was toilet trained during the day? Age:  Not yet:
- g. Was toilet trained at night? Age:  Not yet:

## 02

What is [subject]'s current level of (please tick):

- a. Language:  non-verbal  simple language  fluent
- b. Self-care:  dependent on others  some self-care skills  independent
- c. Mobility:  wheelchair  needs significant support  some difficulty  completely mobile

## 03

Let's talk about behaviors causing concern to you or to other people.  
Have/has [subject] ever had difficulty with any of the following?

- a. Anxiety NO  YES
- b. Depressed mood NO  YES
- c. Extreme shyness NO  YES
- d. Mood swings NO  YES
- e. Aggressive outbursts NO  YES
- f. Temper Tantrums NO  YES
- g. Self-injury, such as hitting self, biting self, scratching self NO  YES
- h. Absent or delayed onset of language to communicate NO  YES
- i. Repeating words or phrases over and over again NO  YES
- j. Poor eye contact NO  YES
- k. Difficulties getting on with other people of similar age NO  YES
- l. Repetitive behaviors, such as doing the same thing over and over again NO  YES
- m. Very rigid or inflexible about how to do things or not liking change in routines NO  YES
- n. Overactivity/hyperactivity, such as being constantly on the go NO  YES
- o. Difficulty paying attention or concentrating NO  YES
- p. Restlessness or fidgetiness, such as wriggling or squirming NO  YES
- q. Impulsivity, such as butting in, not waiting turn NO  YES
- r. Difficulties with eating, such as eating too much, too little, unusual things NO  YES
- s. Sleep difficulties, such as with falling asleep or waking NO  YES
- If you answered YES to any of the above:**
- Have you had further evaluation or support for it? NO  YES
- Would you like to have further evaluation or support for it? NO  YES

## 04

Problem behaviors may add up to meet criteria for specific psychiatric disorders.  
Have/has [subject] ever received a diagnosis of:

- a. Autism Spectrum Disorder (ASD), including autism, Asperger's NO  YES
- b. Attention Deficit Hyperactivity Disorder (ADHD) NO  YES
- c. Anxiety Disorder, including as panic, phobia, separation anxiety disorder NO  YES
- d. Depressive Disorder NO  YES
- e. Obsessive Compulsive Disorder NO  YES
- f. Psychotic Disorder, including schizophrenia NO  YES
- If you answered YES to any of the above**
- Have you had further evaluation or support for it? NO  YES
- Would you like to have further evaluation or support for it? NO  YES

**05** About half of people with TSC will have significant difficulties in their overall intellectual development and may have 'intellectual disability'.

- a. Have you ever been concerned about this for [subject]? NO  YES
- b. Have/has [subject] ever had a formal evaluation of intelligence by a professional using IQ tests? NO  YES   
If YES, what did results show?  
Normal Intellectual Ability (IQ > 80)   
Borderline Intellectual Ability (IQ 70-80)   
Mild Intellectual Disability (IQ 50-69)   
Moderate Intellectual Disability (IQ 35-49)   
Severe Intellectual Disability (IQ 21-34)   
Profound Intellectual Disability (IQ <20)
- c. What is your view of [subject]'s intellectual ability? Normal Intellectual Ability   
Mild-Moderate Intellectual Disability   
Severe - Profound Intellectual Disability
- d. Would you like to have further evaluation or support for it? NO  YES

**06** Many people with TSC who are of school age will have difficulty in school.  
[For individuals of school age]: Does/do [subject] have any difficulty with any of the following:  
[For individuals after school age]: Did [subject] have any difficulty with any of the following:

- a. Reading N/A  NO  YES
- b. Writing N/A  NO  YES
- c. Spelling N/A  NO  YES
- d. Mathematics N/A  NO  YES

**If you answered YES to any of the above**

- Have/has [subject] had further evaluation or support for it? NO  YES
- Have/has [subject] been considered for any additional support in school such as extra help or an Individual Educational Plan (IEP)? NO  YES
- Would you like to have further evaluation or support for [subject]? NO  YES

**07** The majority of people with TSC will have some difficulties in some specific brain skills. Do/does [subject] have difficulty with any of the following:

- a. Memory, such as remembering things that have happened NO  YES
- b. Attention, such as concentrating well, not getting distracted NO  YES
- c. Dual-tasking/ Multi-tasking, such as doing 2 tasks at the same time NO  YES
- d. Visuo-spatial tasks, such as solving puzzles or using building blocks NO  YES
- e. Executive skills, such as planning, organizing, flexible thinking NO  YES
- f. Getting disoriented, such as not knowing the date or where you are NO  YES

**If you answered YES to any of the above**

- Have/has [subject] had further evaluation or support for it? NO  YES
- Would you like to have further evaluation or support for these difficulties? NO  YES

**08**

Apart from the challenges listed above, TSC can have a big impact on people's lives in other ways. Have/has [subject] had any difficulties with:

a. Low self-esteem NO  YES

b. Very high levels of stress in families, for instance between *siblings* NO  YES

c. Very high levels of stress between *parents* leading to significant relationship difficulties NO  YES

**If you answered YES to any of the above**

Have/has [subject] and/or your family had further evaluation or support for it? NO  YES

Would you like to have further evaluation or support for it? NO  YES

**09**

Taking together all the difficulties discussed above, how much have these bothered, troubled or distressed you/your child/family?

Not at all 0 1 2 3 4 5 6 7 8 9 10 Extremely

**10**

Of all the concerns listed above, what are your top priorities to work on next?

- a. ....
- b. ....
- c. ....

**11**

Do you have any other worries about TAND for [subject] that we have not talked about as we went through the checklist?

NO  YES  If YES, please list:.....

.....

.....

.....

.....

.....

.....

.....

**Thank You!**

**12**

Interviewer's judgment of impact/burden on the individual/child/family.

Not at all 0 1 2 3 4 5 6 7 8 9 10 Extremely
